# Supplementary material for: Decoupling of Sr-Nd Isotopic Composition Induced by Potassic Alteration in the Shapinggou Porphyry Mo Deposit of the Qinling–Dabie Orogenic Belt, China
Source: MDPI journal article supplement (doi:10.3390/min11080910), 2021-08-23
Supplement: s1 [file s1]

**Table S1.** Major element contents of quartz syenite and granite porphyry in the Shapinggou porphyry Mo deposit.

| Sample No.       | SiO <sub>2</sub> | Al <sub>2</sub> O <sub>3</sub> | CaO  | Na <sub>2</sub> O | MgO  | FeO  | Fe <sub>2</sub> O <sub>3</sub> | K <sub>2</sub> O | TiO <sub>2</sub> | MnO  | P <sub>2</sub> O <sub>5</sub> | LOI  | Total  | AR   | A/NK | A/CNK | DI    | K-alteration<br>Degree |
|------------------|------------------|--------------------------------|------|-------------------|------|------|--------------------------------|------------------|------------------|------|-------------------------------|------|--------|------|------|-------|-------|------------------------|
|                  | (wt. %)          |                                |      |                   |      |      |                                |                  |                  |      |                               |      |        |      |      |       |       |                        |
| Granite porphyry |                  |                                |      |                   |      |      |                                |                  |                  |      |                               |      |        |      |      |       |       |                        |
| ZK02-1098        | 71.76            | 14.22                          | 0.93 | 4.00              | 0.03 | 0.54 | 0.32                           | 6.92             | 0.03             | 0.03 | 0.01                          | 0.82 | 99.95  | 3.24 | 1.01 | 0.90  | 97.24 | intense                |
| ZK02-1150        | 75.54            | 12.94                          | 0.18 | 4.86              | 0.04 | 0.69 | 0.04                           | 4.10             | 0.04             | 0.14 | 0.01                          | 0.30 | 99.20  | 5.31 | 1.04 | 1.01  | 97.93 |                        |
| ZK02-1185        | 75.42            | 13.30                          | 0.18 | 5.23              | 0.04 | 0.40 | 0.29                           | 4.17             | 0.04             | 0.03 | 0.01                          | 0.25 | 99.86  | 5.61 | 1.01 | 0.99  | 98.72 |                        |
| ZK02-685         | 82.95            | 7.74                           | 0.15 | 1.02              | 0.01 | 0.32 | 0.22                           | 5.17             | 0.06             | 0.01 | 0.01                          | 0.65 | 99.40  | 8.28 | 1.06 | 1.02  | 98.70 |                        |
| ZK52-600         | 80.49            | 9.45                           | 0.27 | 5.22              | 0.11 | 0.46 | 0.24                           | 6.23             | 0.09             | 0.06 | 0.02                          | 0.94 | 99.69  | 4.7  | 1.37 | 1.28  | 96.39 |                        |
| ZK02-2*          | 79.19            | 11.02                          | 0.09 | 2.37              | 0.08 | 0.51 | 0.01                           | 5.88             | 0.09             | 0.01 | 0.02                          | 0.42 | 99.75  | 2.49 | 1.07 | 1.06  | 98.43 |                        |
| ZK92-3*          | 77.08            | 11.84                          | 0.10 | 2.46              | 0.15 | 0.38 | 1.00                           | 5.39             | 0.09             | 0.01 | 0.03                          | 1.10 | 99.64  | 2.4  | 1.20 | 1.17  | 97.05 |                        |
| ZK92-4*          | 77.97            | 11.49                          | 0.08 | 2.41              | 0.12 | 0.38 | 0.37                           | 5.96             | 0.10             | 0.01 | 0.03                          | 0.59 | 99.53  | 2.43 | 1.10 | 1.09  | 98.27 |                        |
|                  |                  |                                |      |                   |      |      |                                |                  |                  |      |                               |      |        |      |      |       |       |                        |
| ZK02-402         | 80.28            | 10.17                          | 0.09 | 1.96              | 0.05 | 0.29 | 0.41                           | 5.68             | 0.06             | 0.01 | 0.01                          | 0.53 | 99.61  | 6.83 | 1.08 | 1.06  | 98.55 | moderate               |
| ZK52-735         | 85.52            | 6.84                           | 0.07 | 1.18              | 0.01 | 0.36 | 0.02                           | 4.40             | 0.03             | 0.01 | 0.01                          | 0.28 | 99.67  | 9.39 | 1.02 | 1.00  | 99.20 |                        |
| ZK52-851         | 77.94            | 10.78                          | 0.33 | 2.24              | 0.14 | 0.40 | 0.26                           | 5.89             | 0.14             | 0.02 | 0.03                          | 0.71 | 99.88  | 6.46 | 1.07 | 1.01  | 97.56 |                        |
| ZK02-1*          | 77.34            | 11.84                          | 0.18 | 2.80              | 0.11 | 0.51 | 0.16                           | 5.83             | 0.11             | 0.01 | 0.02                          | 0.49 | 99.45  | 2.74 | 1.08 | 1.05  | 97.90 |                        |
| ZK92-1*          | 76.90            | 11.81                          | 0.12 | 2.75              | 0.13 | 0.38 | 1.02                           | 5.30             | 0.08             | 0.02 | 0.03                          | 1.02 | 99.59  | 2.71 | 1.15 | 1.13  | 97.29 |                        |
| ZK92-2*          | 76.37            | 12.19                          | 0.15 | 2.98              | 0.15 | 0.38 | 0.51                           | 6.02             | 0.11             | 0.01 | 0.03                          | 0.67 | 99.61  | 2.87 | 1.07 | 1.04  | 98.09 |                        |
|                  |                  |                                |      |                   |      |      |                                |                  |                  |      |                               |      |        |      |      |       |       |                        |
| ZK02-568         | 78.15            | 11.67                          | 0.20 | 2.91              | 0.06 | 0.47 | 0.09                           | 5.91             | 0.11             | 0.01 | 0.01                          | 0.29 | 100.01 | 2.92 | 1.04 | 1.01  | 98.28 | weak                   |
| ZK02-889         | 72.28            | 13.94                          | 0.79 | 2.91              | 0.03 | 0.42 | 0.43                           | 7.88             | 0.22             | 0.02 | 0.01                          | 0.96 | 100.08 | 6.48 | 1.05 | 0.94  | 96.87 |                        |
| ZK52-711         | 80.98            | 8.45                           | 0.47 | 1.42              | 0.05 | 0.33 | 0.58                           | 5.34             | 0.15             | 0.01 | 0.01                          | 0.89 | 99.97  | 7.26 | 1.04 | 0.94  | 97.80 |                        |
| ZK02-288*        | 76.32            | 11.97                          | 0.54 | 3.96              | 0.11 | 0.37 | 0.81                           | 4.37             | 0.06             | 0.02 | 0.02                          | 1.34 | 100.03 | 4.45 | 1.06 | 0.98  | 96.74 |                        |

Quartz syenite

|            |       |       |      |      |      |      |      |      |      |      |      |      |        |      |      |      |       |
|------------|-------|-------|------|------|------|------|------|------|------|------|------|------|--------|------|------|------|-------|
| J03-1      | 67.05 | 16.41 | 1.16 | 4.93 | 0.67 | 1.18 | 1.22 | 5.48 | 0.39 | 0.13 | 0.17 | 0.90 | 100.00 | 3.91 | 1.17 | 1.02 | 89.22 |
| ZK05-95    | 63.92 | 16.43 | 1.01 | 5.27 | 0.86 | 1.37 | 2.38 | 5.66 | 0.45 | 0.04 | 0.34 | 1.04 | 100.87 | 4.06 | 1.11 | 0.99 | 91.61 |
| ZK501-540* | 64.00 | 15.20 | 1.04 | 4.65 | 0.14 | 2.04 | 3.35 | 5.75 | 0.61 | 0.14 | 0.21 | 2.03 | 100.03 | 3.68 | 1.09 | 0.96 | 91.60 |
| J01*       | 62.00 | 17.05 | 1.58 | 5.15 | 0.09 | 1.66 | 1.86 | 5.31 | 0.45 | 0.09 | 0.38 | 2.38 | 100.13 | 3.47 | 1.20 | 1.00 | 90.36 |
| J03*       | 64.00 | 16.95 | 1.20 | 4.93 | 0.12 | 1.49 | 1.45 | 5.40 | 0.40 | 0.12 | 0.19 | 1.90 | 99.38  | 3.87 | 1.16 | 1.01 | 91.99 |
| J10*       | 67.50 | 16.47 | 0.79 | 5.63 | 0.44 | 0.92 | 1.19 | 5.45 | 0.34 | 0.09 | 0.10 | 0.33 | 99.41  | 4.59 | 1.09 | 0.99 | 94.12 |
| J11*       | 66.65 | 16.55 | 0.90 | 5.63 | 0.47 | 0.91 | 1.42 | 5.44 | 0.34 | 0.10 | 0.11 | 0.79 | 99.47  | 4.47 | 1.09 | 0.98 | 93.46 |
| ZK501-1*   | 67.52 | 16.31 | 0.69 | 5.58 | 0.39 | 0.92 | 1.19 | 5.44 | 0.27 | 0.10 | 0.09 | 0.91 | 99.54  | 4.69 | 1.08 | 1.00 | 94.55 |

weak

\* Data come from He et al. [1].

**Table S2.** Trace element contents of quartz syenite and granite porphyry.

| Sample No.       | Rb    | Ba   | Th   | U    | K     | Nb   | La   | Ce   | Sr   | Nd   | P   | Zr   | Hf   | Sm   | Ti   | Y    | Yb   | Lu   | Rb/Sr | K-alteration |
|------------------|-------|------|------|------|-------|------|------|------|------|------|-----|------|------|------|------|------|------|------|-------|--------------|
|                  | (ppm) |      |      |      |       |      |      |      |      |      |     |      |      |      |      |      |      |      |       | Degree       |
| Granite porphyry |       |      |      |      |       |      |      |      |      |      |     |      |      |      |      |      |      |      |       |              |
| ZK02-1098        | 877   | 25.1 | 28.2 | 39.9 | 57925 | 108  | 12.6 | 23.9 | 10.8 | 5.10 | 10  | 86.0 | 5.90 | 0.63 | 180  | 14.1 | 1.94 | 0.47 | 81.2  | intense      |
| ZK02-1150        | 1795  | 28.4 | 30.6 | 37.7 | 34400 | 144  | 28.0 | 51.2 | 5.30 | 10.0 | 10  | 100  | 11.3 | 1.47 | 240  | 19.2 | 4.53 | 0.95 | 339   |              |
| ZK02-1185        | 1230  | 45.0 | 31.3 | 40.3 | 34738 | 150  | 28.9 | 52.2 | 6.90 | 9.80 | 20  | 102  | 11.2 | 1.30 | 240  | 17.5 | 3.94 | 0.84 | 178   |              |
| ZK02-685         | 463   | 36.3 | 61.9 | 43.4 | 43443 | 201  | 25.5 | 47.7 | 16.6 | 9.80 | 20  | 144  | 12.1 | 1.12 | 360  | 6.80 | 1.70 | 0.42 | 27.9  |              |
| ZK52-600         | 560   | 186  | 37.2 | 8.01 | 52350 | 91.0 | 26.8 | 39.1 | 7.70 | 7.20 | 30  | 123  | 5.80 | 0.83 | 540  | 3.40 | 0.49 | 0.12 | 72.7  |              |
| ZK52-601         | 610   | 97.5 | 42.3 | 9.03 | 29464 | 86.9 | 25.0 | 36.2 | 2.20 | 6.60 | 40  | 113  | 5.40 | 0.68 | 600  | 2.10 | 0.51 | 0.13 | 277   |              |
| ZK02-2*          | 451   | 150  | 59.8 | 17.4 | 49121 | 113  | 48.5 | 68.6 | 27.0 | 12.3 | 60  | 137  | 6.50 | 1.38 | 544  | 6.40 | 1.10 | 0.21 | 16.7  |              |
| ZK92-3*          | 517   | 114  | 30.3 | 12.3 | 45388 | 130  | 21.6 | 30.4 | 16.8 | 5.90 | 90  | 136  | 7.30 | 0.80 | 548  | 5.90 | 1.11 | 0.23 | 30.8  |              |
| ZK92-4*          | 545   | 137  | 41.1 | 7.76 | 49985 | 125  | 53.2 | 76.3 | 17.6 | 14.6 | 100 | 138  | 7.50 | 1.74 | 606  | 7.70 | 1.23 | 0.23 | 31.0  |              |
|                  |       |      |      |      |       |      |      |      |      |      |     |      |      |      |      |      |      |      |       |              |
| ZK02-402         | 513   | 102  | 37.1 | 10.3 | 47570 | 99.1 | 22.9 | 32.8 | 35.8 | 5.80 | 30  | 130  | 7.20 | 0.80 | 360  | 4.90 | 0.96 | 0.25 | 14.3  | moderate     |
| ZK52-735         | 368   | 16.9 | 25.9 | 20.8 | 36735 | 96.5 | 5.80 | 9.90 | 4.70 | 2.10 | 10  | 54.0 | 3.60 | 0.20 | 180  | 2.10 | 0.38 | 0.12 | 78.3  |              |
| ZK52-851         | 478   | 58.9 | 68.3 | 21.6 | 49284 | 93.3 | 36.6 | 58.6 | 17.4 | 12.2 | 120 | 175  | 7.80 | 1.44 | 840  | 7.60 | 1.43 | 0.32 | 27.5  |              |
| ZK92-1*          | 501   | 137  | 43.8 | 12.9 | 44617 | 140  | 38.6 | 54.9 | 24.2 | 10.3 | 90  | 148  | 7.90 | 1.27 | 487  | 7.90 | 1.38 | 0.29 | 20.7  |              |
| ZK92-2*          | 534   | 282  | 47.8 | 13.3 | 50488 | 118  | 42.4 | 64.3 | 30.6 | 13.7 | 130 | 179  | 7.70 | 1.76 | 667  | 9.00 | 1.58 | 0.29 | 17.5  |              |
|                  |       |      |      |      |       |      |      |      |      |      |     |      |      |      |      |      |      |      |       |              |
| ZK02-568         | 457   | 176  | 59.7 | 14.7 | 49178 | 102  | 30.4 | 44.6 | 43.2 | 8.50 | 60  | 147  | 6.80 | 0.98 | 660  | 4.90 | 1.02 | 0.25 | 10.6  | weak         |
| ZK02-889         | 817   | 75.1 | 60.2 | 194  | 65968 | 476  | 16.0 | 35.1 | 22.5 | 8.70 | 20  | 277  | 18.5 | 1.18 | 1320 | 11.3 | 3.01 | 0.71 | 36.3  |              |
| ZK52-711         | 485   | 107  | 36.4 | 4.80 | 44722 | 91.0 | 11.7 | 17.3 | 12.7 | 3.40 | 20  | 158  | 5.70 | 0.42 | 900  | 2.80 | 0.41 | 0.10 | 38.2  |              |
| ZK02-288*        | 401   | 112  | 33.3 | 12.6 | 36743 | 123  | 33.9 | 52.1 | 67.4 | 9.80 | 60  | 128  | 8.00 | 1.27 | 360  | 11.3 | 1.76 | 0.39 | 5.95  |              |

|                |     |      |      |      |       |      |      |     |     |      |      |      |      |      |      |      |      |      |      |
|----------------|-----|------|------|------|-------|------|------|-----|-----|------|------|------|------|------|------|------|------|------|------|
| Quartz syenite |     |      |      |      |       |      |      |     |     |      |      |      |      |      |      |      |      |      |      |
| J03-1          | 341 | 1560 | 55.9 | 12.4 | 45885 | 72.5 | 114  | 175 | 324 | 52.1 | 1060 | 573  | 13.7 | 6.94 | 2462 | 22.5 | 2.92 | 0.49 | 1.05 |
| ZK05-95        | 237 | 2610 | 87.5 | 16.2 | 47046 | 101  | 143  | 246 | 518 | 71.2 | 1440 | 661  | 16.2 | 10.0 | 2700 | 30.5 | 3.76 | 0.71 | 0.46 |
| ZK501-540      | 346 | 804  | 200  | 24.1 | 48701 | 256  | 103  | 251 | 186 | 81.6 | 850  | 1100 | 26.9 | 14.5 | 3735 | 64.0 | 7.61 | 1.20 | 1.86 |
| J01*           | 293 | 2690 | 83.4 | 14.4 | 45136 | 74.2 | 130  | 207 | 742 | 53.3 | 1500 | 684  | 14.3 | 7.73 | 2762 | 24.8 | 2.82 | 0.55 | 0.39 |
| J03*           | 299 | 1755 | 55.6 | 11.4 | 45676 | 73.8 | 92.2 | 159 | 361 | 44.4 | 780  | 588  | 12.8 | 6.92 | 2462 | 21.5 | 2.51 | 0.47 | 0.83 |
| J10*           | 212 | 848  | 116  | 24.9 | 45643 | 128  | 108  | 177 | 228 | 51.3 | 430  | 487  | 14.1 | 7.04 | 2059 | 27.4 | 3.73 | 0.61 | 0.93 |
| J11*           | 215 | 813  | 117  | 26.0 | 45744 | 139  | 120  | 197 | 196 | 58.0 | 470  | 538  | 15.0 | 8.10 | 2067 | 30.3 | 4.06 | 0.64 | 1.10 |
| J27*           | 682 | 2700 | 72.7 | 22.1 | 48060 | 94.3 | 132  | 216 | 746 | 55.9 | 1040 | 471  | 10.3 | 8.28 | 1680 | 27.8 | 3.39 | 0.58 | 0.91 |
| ZK501-1*       | 257 | 693  | 121  | 22.6 | 45767 | 129  | 93.5 | 158 | 194 | 45.7 | 370  | 474  | 13.1 | 6.52 | 1643 | 29.0 | 3.55 | 0.56 | 1.33 |
| ZK501-600*     | 338 | 766  | 130  | 27.0 | 49235 | 158  | 109  | 184 | 268 | 45.0 | 350  | 490  | 13.6 | 6.99 | 1721 | 31.2 | 3.87 | 0.66 | 1.26 |

weak

\* Data come from He et al. [1].

Table S3. Rare earth element contents of quartz syenite and granite porphyry

| Sample           | La    | Ce   | Pr   | Nd   | Sm   | Eu   | Gd   | Tb   | Dy   | Ho   | Er   | Tm   | Yb   | Lu   | Y    | ΣREE  | LREE | HREE  | LREE/<br>HREE | LaN/YbN | δ <sub>Eu</sub> | δ <sub>Ce</sub> |
|------------------|-------|------|------|------|------|------|------|------|------|------|------|------|------|------|------|-------|------|-------|---------------|---------|-----------------|-----------------|
|                  | (ppm) |      |      |      |      |      |      |      |      |      |      |      |      |      |      |       |      |       |               |         |                 |                 |
| Granite porphyry |       |      |      |      |      |      |      |      |      |      |      |      |      |      |      |       |      |       |               |         |                 |                 |
| ZK02-1185        | 28.9  | 52.2 | 3.98 | 9.80 | 1.30 | 0.11 | 1.14 | 0.27 | 1.62 | 0.47 | 1.79 | 0.49 | 3.94 | 0.84 | 17.5 | 106.9 | 96.3 | 10.56 | 9.12          | 5.26    | 0.27            | 1.04            |
| ZK02-1098        | 12.6  | 23.9 | 1.84 | 5.10 | 0.63 | 0.07 | 0.70 | 0.14 | 0.98 | 0.29 | 1.06 | 0.23 | 1.94 | 0.47 | 14.1 | 49.95 | 44.1 | 5.81  | 7.60          | 4.66    | 0.32            | 1.08            |
| ZK52-600         | 26.8  | 39.1 | 2.69 | 7.20 | 0.83 | 0.12 | 0.50 | 0.12 | 0.43 | 0.11 | 0.36 | 0.10 | 0.49 | 0.12 | 3.40 | 78.97 | 76.7 | 2.23  | 34.4          | 39.2    | 0.53            | 0.90            |
| ZK02-685         | 25.5  | 47.7 | 3.72 | 9.80 | 1.12 | 0.10 | 0.87 | 0.17 | 0.95 | 0.25 | 0.96 | 0.19 | 1.70 | 0.42 | 6.80 | 93.45 | 87.9 | 5.51  | 16.0          | 10.8    | 0.30            | 1.06            |
| ZK52-735         | 5.80  | 9.90 | 0.80 | 2.10 | 0.20 | 0.03 | 0.23 | 0.06 | 0.22 | 0.06 | 0.21 | 0.09 | 0.38 | 0.12 | 2.10 | 20.20 | 18.8 | 1.37  | 13.7          | 11.0    | 0.43            | 0.98            |
| ZK02-889         | 16.0  | 35.1 | 3.04 | 8.70 | 1.18 | 0.16 | 0.93 | 0.18 | 1.06 | 0.31 | 1.33 | 0.36 | 3.01 | 0.71 | 11.3 | 72.07 | 64.2 | 7.89  | 8.13          | 3.81    | 0.45            | 1.15            |
| ZK02-568         | 30.4  | 44.6 | 3.33 | 8.50 | 0.98 | 0.17 | 0.65 | 0.16 | 0.67 | 0.20 | 0.65 | 0.15 | 1.02 | 0.25 | 4.90 | 91.73 | 88.0 | 3.75  | 23.5          | 21.4    | 0.61            | 0.89            |
| ZK52-711         | 11.7  | 17.3 | 1.19 | 3.40 | 0.42 | 0.08 | 0.24 | 0.07 | 0.31 | 0.10 | 0.27 | 0.05 | 0.41 | 0.10 | 2.80 | 35.64 | 34.1 | 1.55  | 22.0          | 20.5    | 0.70            | 0.91            |
| ZK02-402         | 22.9  | 32.8 | 2.33 | 5.80 | 0.80 | 0.07 | 0.60 | 0.14 | 0.65 | 0.19 | 0.54 | 0.16 | 0.96 | 0.25 | 4.90 | 68.19 | 64.7 | 3.49  | 18.5          | 17.1    | 0.30            | 0.88            |
| ZK02-2           | 48.5  | 68.6 | 5.17 | 12.3 | 1.38 | 0.17 | 0.92 | 0.13 | 0.82 | 0.19 | 0.64 | 0.13 | 1.10 | 0.21 | 6.40 | 140.3 | 136  | 4.14  | 32.9          | 31.6    | 0.43            | 0.87            |
| ZK02-1150        | 28.0  | 51.2 | 4.00 | 10.0 | 1.47 | 0.13 | 1.29 | 0.30 | 1.73 | 0.56 | 1.93 | 0.53 | 4.53 | 0.95 | 19.2 | 106.6 | 94.8 | 11.82 | 8.02          | 4.43    | 0.28            | 1.04            |
| ZK52-601         | 25.0  | 36.2 | 2.45 | 6.60 | 0.68 | 0.14 | 0.41 | 0.08 | 0.33 | 0.06 | 0.23 | 0.06 | 0.51 | 0.13 | 2.10 | 72.88 | 71.1 | 1.81  | 39.3          | 35.2    | 0.75            | 0.90            |
| ZK52-851         | 36.6  | 58.6 | 4.49 | 12.2 | 1.44 | 0.17 | 1.02 | 0.18 | 0.95 | 0.25 | 0.80 | 0.17 | 1.43 | 0.32 | 7.6  | 118.6 | 114  | 5.12  | 22.2          | 18.4    | 0.41            | 0.95            |
| ZK92-3*          | 21.6  | 30.4 | 2.29 | 5.90 | 0.80 | 0.14 | 0.66 | 0.10 | 0.67 | 0.16 | 0.57 | 0.13 | 1.11 | 0.23 | 5.90 | 64.76 | 61.1 | 3.63  | 16.8          | 14.0    | 0.57            | 0.86            |
| ZK92-2*          | 42.4  | 64.3 | 5.19 | 13.7 | 1.76 | 0.27 | 1.30 | 0.20 | 1.12 | 0.26 | 0.87 | 0.17 | 1.58 | 0.29 | 9.00 | 133.4 | 128  | 5.79  | 22.0          | 19.3    | 0.52            | 0.90            |
| ZK02-288*        | 33.9  | 52.1 | 3.86 | 9.80 | 1.27 | 0.20 | 1.10 | 0.21 | 1.19 | 0.35 | 1.13 | 0.23 | 1.76 | 0.39 | 11.3 | 107.5 | 101  | 6.36  | 15.9          | 13.8    | 0.51            | 0.93            |
| ZK02-1*          | 57.4  | 78.9 | 5.93 | 13.9 | 1.54 | 0.19 | 0.99 | 0.15 | 0.91 | 0.22 | 0.78 | 0.16 | 1.29 | 0.25 | 7.40 | 162.6 | 158  | 4.75  | 33.2          | 31.9    | 0.44            | 0.85            |
| ZK92-1*          | 38.6  | 54.9 | 4.06 | 10.3 | 1.27 | 0.22 | 1.03 | 0.17 | 0.94 | 0.22 | 0.78 | 0.16 | 1.38 | 0.29 | 7.90 | 114.3 | 109  | 4.97  | 22.0          | 20.1    | 0.57            | 0.87            |
| ZK92-4*          | 53.2  | 76.3 | 5.68 | 14.6 | 1.74 | 0.23 | 1.31 | 0.18 | 1.05 | 0.23 | 0.73 | 0.14 | 1.23 | 0.23 | 7.70 | 156.9 | 152  | 5.10  | 29.8          | 31.0    | 0.45            | 0.88            |

Quartz syenite

|            |      |      |      |      |      |      |       |      |      |      |      |      |      |      |      |        |      |       |      |       |      |      |
|------------|------|------|------|------|------|------|-------|------|------|------|------|------|------|------|------|--------|------|-------|------|-------|------|------|
| J03-1      | 114  | 175  | 16.6 | 52.1 | 6.94 | 1.41 | 4.89  | 0.71 | 3.76 | 0.77 | 2.32 | 0.36 | 2.92 | 0.49 | 22.5 | 381.22 | 365  | 16.22 | 22.5 | 27.88 | 0.70 | 0.87 |
| ZK05-95    | 143  | 246  | 21.9 | 71.2 | 10.0 | 1.92 | 6.68  | 1.05 | 5.55 | 1.17 | 3.38 | 0.54 | 3.76 | 0.71 | 30.5 | 516.36 | 494  | 22.84 | 21.6 | 27.18 | 0.68 | 0.97 |
| ZK501-540  | 103  | 251  | 27.0 | 81.6 | 14.5 | 1.59 | 10.30 | 1.73 | 9.63 | 2.15 | 6.72 | 1.08 | 7.61 | 1.20 | 64.0 | 519.11 | 479  | 40.42 | 11.8 | 9.71  | 0.38 | 1.14 |
| ZK52-197   | 54.4 | 98.5 | 9.08 | 30.8 | 5.25 | 0.51 | 4.23  | 0.74 | 4.62 | 0.95 | 2.79 | 0.45 | 2.43 | 0.37 | 26.7 | 215.12 | 1989 | 16.58 | 12.0 | 16.06 | 0.32 | 0.99 |
| ZK52-3     | 143  | 253  | 21.7 | 66.7 | 9.15 | 0.91 | 5.82  | 1.03 | 6.08 | 1.38 | 4.09 | 0.74 | 4.95 | 0.89 | 36.5 | 519.44 | 494  | 24.98 | 19.8 | 20.72 | 0.36 | 0.99 |
| J01*       | 130  | 207  | 18.9 | 53.3 | 7.73 | 1.80 | 5.31  | 0.79 | 3.88 | 0.83 | 2.39 | 0.39 | 2.82 | 0.55 | 24.8 | 435.69 | 419  | 16.96 | 24.7 | 33.07 | 0.81 | 0.91 |
| J03*       | 92.2 | 159  | 15.4 | 44.4 | 6.92 | 1.55 | 4.62  | 0.64 | 3.47 | 0.69 | 2.19 | 0.37 | 2.51 | 0.47 | 21.5 | 334.43 | 319  | 14.96 | 21.4 | 26.35 | 0.79 | 0.94 |
| J10*       | 108  | 177  | 16.8 | 51.3 | 7.04 | 1.04 | 4.92  | 0.74 | 4.49 | 0.94 | 2.83 | 0.47 | 3.73 | 0.61 | 27.4 | 379.36 | 361  | 18.73 | 19.3 | 20.67 | 0.51 | 0.92 |
| J11*       | 120  | 197  | 18.9 | 58.0 | 8.10 | 1.10 | 5.59  | 0.87 | 4.93 | 1.03 | 3.22 | 0.51 | 4.06 | 0.64 | 30.3 | 423.4  | 403  | 20.85 | 19.3 | 21.11 | 0.47 | 0.92 |
| J27*       | 132  | 216  | 19.6 | 55.9 | 8.28 | 1.72 | 5.50  | 0.85 | 4.54 | 0.95 | 2.90 | 0.46 | 3.39 | 0.58 | 27.8 | 452.17 | 433  | 19.17 | 22.6 | 27.82 | 0.73 | 0.93 |
| ZK501-1*   | 93.5 | 158  | 14.8 | 45.7 | 6.52 | 0.95 | 4.83  | 0.76 | 4.42 | 0.92 | 2.81 | 0.49 | 3.55 | 0.56 | 29.0 | 337.26 | 319  | 18.34 | 17.4 | 18.89 | 0.50 | 0.94 |
| ZK501-600* | 109  | 184  | 16.5 | 45.0 | 6.99 | 1.00 | 4.73  | 0.80 | 4.61 | 1.00 | 3.22 | 0.56 | 3.87 | 0.66 | 31.2 | 381.44 | 362  | 19.45 | 18.6 | 20.11 | 0.50 | 0.95 |

---

\* Data come from He et al. [1].

**Table S4.** Whole rock Sr-Nd isotopic composition of quartz syenite and granite porphyry.

| Sample                    | Rb    | Sr   | $(^{87}\text{Rb}/^{86}\text{Sr})_{\text{m}}$ | $(^{87}\text{Sr}/^{86}\text{Sr})_{\text{m}}$ | $(^{87}\text{Sr}/^{86}\text{Sr})_{\text{t}}$ | Sm    | Nd   | $(^{147}\text{Sm}/^{144}\text{Nd})_{\text{m}}$ | $(^{143}\text{Nd}/^{144}\text{Nd})_{\text{m}}$ | $(^{143}\text{Nd}/^{144}\text{Nd})_{\text{t}}$ | $\epsilon_{\text{Nd}}(\text{t})$ | T <sub>DM2</sub> | K-alteration |
|---------------------------|-------|------|----------------------------------------------|----------------------------------------------|----------------------------------------------|-------|------|------------------------------------------------|------------------------------------------------|------------------------------------------------|----------------------------------|------------------|--------------|
|                           | (ppm) |      |                                              |                                              |                                              | (ppm) |      |                                                |                                                |                                                |                                  | (Ma)             | Degree       |
| Granite porphyry (114 Ma) |       |      |                                              |                                              |                                              |       |      |                                                |                                                |                                                |                                  |                  |              |
| ZK02-1098                 | 877   | 10.8 | 229                                          | 0.972013                                     | 0.6004                                       | 0.63  | 5.1  | 0.0784                                         | 0.511862                                       | 0.511804                                       | -13.4                            | 2005             | intense      |
| ZK02-1185                 | 1230  | 6.9  | 504                                          | 1.321131                                     | 0.5054                                       | 1.30  | 9.8  | 0.0842                                         | 0.511833                                       | 0.511770                                       | -14.1                            | 2057             |              |
| ZK02-685                  | 463   | 16.6 | 78.8                                         | 0.820267                                     | 0.6926                                       | 1.12  | 9.8  | 0.0725                                         | 0.511836                                       | 0.511782                                       | -13.8                            | 2040             |              |
| ZK52-600                  | 560   | 7.7  | 205                                          | 1.016556                                     | 0.6838                                       | 0.83  | 7.2  | 0.0731                                         | 0.511859                                       | 0.511804                                       | -13.4                            | 2003             |              |
| ZK92-3*                   | 517   | 16.8 | 86.9                                         | 0.833675                                     | 0.6929                                       | 0.80  | 5.9  | 0.0860                                         | 0.511876                                       | 0.511812                                       | -13.3                            | 1992             |              |
| ZK02-402                  | 513   | 35.8 | 40.5                                         | 0.768102                                     | 0.7014                                       | 0.80  | 5.8  | 0.0875                                         | 0.511803                                       | 0.511737                                       | -14.7                            | 2108             | moderate     |
| ZK52-735*                 | 368   | 4.7  | 221                                          | 1.062234                                     | 0.7039                                       | 0.20  | 2.1  | 0.0604                                         | 0.511795                                       | 0.511750                                       | -14.5                            | 2091             |              |
| ZK92-2*                   | 534   | 30.6 | 49.3                                         | 0.779802                                     | 0.6999                                       | 1.76  | 13.7 | 0.0815                                         | 0.511826                                       | 0.511765                                       | -14.2                            | 2065             |              |
| ZK02-568                  | 457   | 43.2 | 29.9                                         | 0.755759                                     | 0.7074                                       | 0.98  | 8.5  | 0.0731                                         | 0.511826                                       | 0.511771                                       | -14.1                            | 2056             | weak         |
| ZK02-889                  | 817   | 22.5 | 103                                          | 0.872300                                     | 0.7061                                       | 1.18  | 8.7  | 0.0861                                         | 0.511844                                       | 0.511780                                       | -13.9                            | 2042             |              |
| ZK52-711                  | 485   | 12.7 | 108                                          | 0.884141                                     | 0.7094                                       | 0.42  | 3.4  | 0.0784                                         | 0.511792                                       | 0.511734                                       | -14.8                            | 2116             |              |
| ZK02-288*                 | 401   | 67.4 | 16.8                                         | 0.734581                                     | 0.7074                                       | 1.27  | 9.8  | 0.0822                                         | 0.511860                                       | 0.511799                                       | -13.5                            | 2012             |              |
| Quartz syenite (116 Ma)   |       |      |                                              |                                              |                                              |       |      |                                                |                                                |                                                |                                  |                  |              |
| J03-1                     | 341   | 324  | 2.34                                         | 0.712808                                     | 0.7090                                       | 6.94  | 52.1 | 0.0989                                         | 0.511854                                       | 0.511779                                       | -13.9                            | 2040             | weak         |
| J27                       | 682   | 746  | 2.58                                         | 0.712158                                     | 0.7079                                       | 8.28  | 55.9 | 0.0886                                         | 0.511886                                       | 0.511794                                       | -13.2                            | 1983             |              |
| ZK05-95                   | 237   | 518  | 1.29                                         | 0.710213                                     | 0.7081                                       | 10.0  | 71.2 | 0.0891                                         | 0.511899                                       | 0.511831                                       | -12.8                            | 1957             |              |
| J03*                      | 299   | 361  | 2.34                                         | 0.711583                                     | 0.7077                                       | 6.92  | 44.4 | 0.0989                                         | 0.511854                                       | 0.511779                                       | -13.9                            | 2040             |              |
| J11*                      | 215   | 196  | 3.11                                         | 0.712799                                     | 0.7077                                       | 8.10  | 58.0 | 0.0989                                         | 0.511861                                       | 0.511779                                       | -13.6                            | 2017             |              |
| ZK501-1*                  | 257   | 194  | 3.75                                         | 0.713900                                     | 0.7077                                       | 6.52  | 45.7 | 0.0940                                         | 0.511891                                       | 0.511815                                       | -13.0                            | 1971             |              |

\* Data come from He et al. [1].

**Table S5.** Trace element contents and Sr isotopic composition of minerals from quartz syenite and granite porphyry.

| Sample           | Mineral | Rb    | Ba   | Th   | U    | Nb   | La   | Ce   | Sr   | Nd   | Zr   | Hf   | Sm   | Y    | Yb   | Lu   | <sup>87</sup> Rb/ <sup>86</sup> Sr | <sup>87</sup> Sr/ <sup>86</sup> Sr | 2σ <sub>m</sub> | (⁸⁷Sr/⁸⁶Sr) <sub>t</sub> | K-alteration<br>Degree |
|------------------|---------|-------|------|------|------|------|------|------|------|------|------|------|------|------|------|------|------------------------------------|------------------------------------|-----------------|--------------------------|------------------------|
|                  |         | (ppm) |      |      |      |      |      |      |      |      |      |      |      |      |      |      |                                    |                                    |                 |                          |                        |
| Quartz syenite   |         |       |      |      |      |      |      |      |      |      |      |      |      |      |      |      |                                    |                                    |                 |                          |                        |
| J10              | Ap      | 231   | 26.5 | 243  | 27.6 | 33.1 | 3408 | 6406 | 391  | 2263 | 1026 | 24.9 | 282  | 849  | 84.4 | 14.0 | 1.71                               | 0.710925                           | 15              | 0.7081                   | weak                   |
|                  | Bi      | 1582  | 3740 | 14.2 | 13.3 | 186  | 45.7 | 71.5 | 24.7 | 15.5 | 102  | 2.93 | 1.85 | 5.35 | 0.82 | 0.16 | 13.2                               | 0.730017                           | 15              | 0.7083                   |                        |
|                  | Kfs     | 403   | 547  | 1.30 | 1.04 | 5.25 | 5.97 | 8.57 | 104  | 1.50 | 19.5 | 0.61 | 0.16 | 0.38 | 0.08 | 0.02 | 11.3                               | 0.722969                           | 13              | 0.7044                   |                        |
|                  | Pl      | 266   | 509  | 1.96 | 1.34 | 7.64 | 8.48 | 12.3 | 124  | 2.14 | 30.1 | 1.17 | 0.25 | 0.66 | 0.13 | 0.04 | 6.24                               | 0.716912                           | 15              | 0.7066                   |                        |
|                  | Qtz     | 3.47  | 5.47 | 1.91 | 1.44 | 4.03 | 12.0 | 23.0 | 7.68 | 5.73 | 41.6 | 1.16 | 0.75 | 2.19 | 0.30 | 0.06 | 1.58                               | 0.710590                           | 13              | 0.7080                   |                        |
| Granite porphyry |         |       |      |      |      |      |      |      |      |      |      |      |      |      |      |      |                                    |                                    |                 |                          |                        |
| ZK02-288         | Kfs     | 854   | 2478 | 1.52 | 0.71 | 4.37 | 2.32 | 5.58 | 232  | 2.06 | 23.3 | 0.69 | 0.45 | 1.02 | 0.15 | 0.02 | 10.7                               | 0.721633                           | 16              | 0.7044                   | weak                   |
|                  | Pl      | 543   | 1924 | 3.92 | 1.19 | 6.30 | 8.46 | 21.1 | 335  | 7.84 | 49.4 | 1.35 | 1.51 | 3.10 | 0.44 | 0.07 | 4.70                               | 0.715254                           | 18              | 0.7076                   |                        |
|                  | Qtz     | 16.7  | 33.8 | 1.50 | 0.38 | 1.95 | 5.01 | 9.61 | 24.8 | 2.85 | 12.1 | 0.34 | 0.46 | 1.18 | 0.13 | 0.02 | 1.87                               | 0.711408                           | 15              | 0.7084                   |                        |
| ZK02-402         | Kfs     | 1009  | 337  | 2.23 | 1.39 | 13.3 | 0.93 | 1.62 | 20.9 | 0.30 | 22.9 | 1.07 | 0.05 | 0.23 | 0.07 | 0.01 | 185                                | 0.789201                           | 14              | 0.4895                   | moderate               |
|                  | Pl      | 677   | 216  | 9.47 | 2.92 | 25.5 | 3.13 | 6.25 | 24.8 | 1.17 | 64.8 | 2.79 | 0.17 | 0.84 | 0.28 | 0.06 | 541                                | 0.759770                           | 17              | -0.1170                  |                        |
|                  | Qtz     | 13.6  | 3.07 | 3.47 | 0.63 | 4.57 | 3.76 | 6.28 | 1.78 | 1.08 | 7.46 | 0.32 | 0.14 | 0.76 | 0.11 | 0.02 | 19.5                               | 0.731097                           | 16              | 0.6995                   |                        |
| ZK02-1098        | Bi      | 10927 | 38.4 | 73.5 | 144  | 1077 | 77.9 | 153  | 3.61 | 33.0 | 208  | 20.3 | 5.01 | 38.0 | 11.8 | 2.25 | 14642                              | 6.279480                           | 220             | -17.442                  | intense                |
|                  | Kfs     | 3695  | 60.9 | 0.68 | 2.81 | 11.5 | 0.16 | 0.32 | 6.12 | 0.07 | 10.9 | 0.82 | 0.02 | 0.17 | 0.08 | 0.02 | 8199                               | 1.349507                           | 49              | -11.934                  |                        |
|                  | Pl      | 1472  | 33.3 | 3.58 | 7.78 | 25.9 | 0.77 | 1.86 | 11.6 | 0.42 | 32.5 | 2.41 | 0.06 | 0.46 | 0.31 | 0.07 | 3341                               | 0.987474                           | 19              | -4.4253                  |                        |
|                  | Qtz     | 8.93  | 0.89 | 4.14 | 3.15 | 9.66 | 1.16 | 2.23 | 1.49 | 0.38 | 9.46 | 0.66 | 0.05 | 0.55 | 0.20 | 0.04 | 15.6                               | 0.723829                           | 18              | 0.6986                   |                        |

Mineral abbreviations: Ap, apatite; Bi, biotite; Kfs, K-feldspar; Qtz, quartz; Pl, plagioclase

1. He, J.; Xu, X.C.; Wang, P.; Fan, Z.L.; Fu, Z.Y.; Wang, B.H.; Zhuang, H.D.; Xie, Q.Q. Potassic metasomatism of ore-bearing igneous rocks and response from trace elements and Sr-Nd isotopes in Shapinggou porphyry Mo deposit, Anhui Province. *Miner. Depos.* **2018**, *37*, 611–629 (in Chinese with English abstract).
